# Supplementary material
Source: PubMed Central journal article supplement (PMC3105198)

- |         |                              |
|---------|------------------------------|
| ◇ M Sal | ● ◻ ▽ ◇ < 20 spines / 10 μm  |
| ▽ M Coc | ● ◻ ▽ ◇ 20-30 spines / 10 μm |
| ◻ F Sal | ● ◻ ▽ ◇ > 30 spines / 10 μm  |
| ● F Coc |                              |

Bregma 2.2 - 1.7 mm

Bregma 1.6 - 1.2 mm

left

right

left

right

M Sal

M Coc

F Sal

F Coc

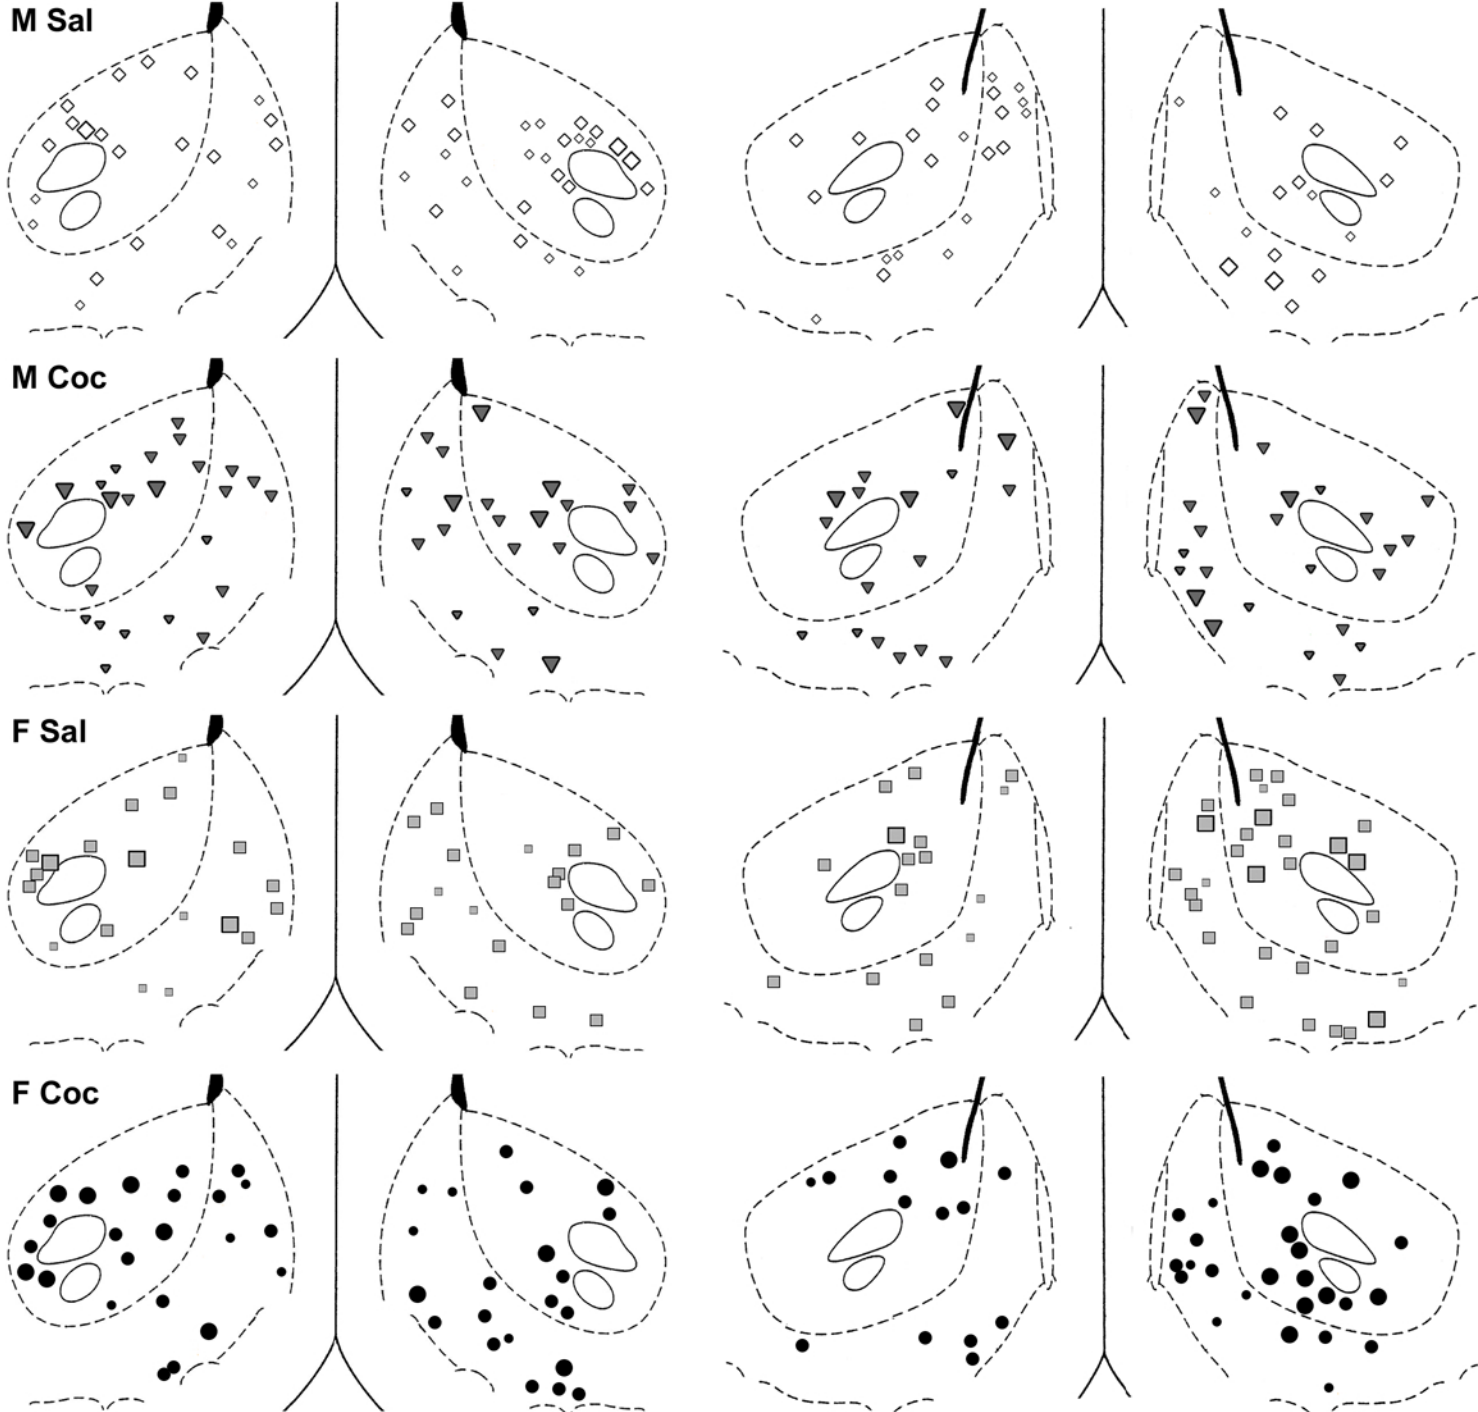

Supplement: NIHMS289458-supplement-01.pdf [file NIHMS289458-supplement-01.pdf]
