# Supplementary material
Source: PubMed Central journal article supplement (PMC3105198)
Supplement: NIHMS289458-supplement-03.pdf [file NIHMS289458-supplement-03.pdf]

## Core

## Shell

### Male Saline

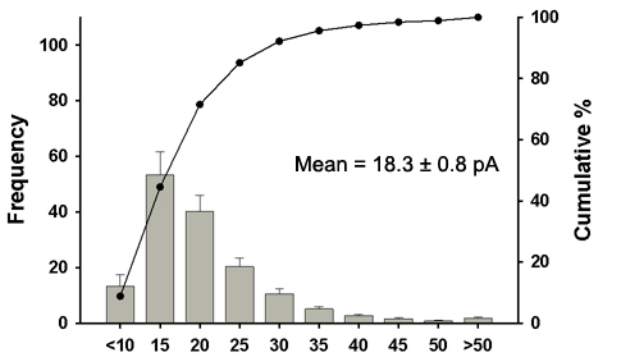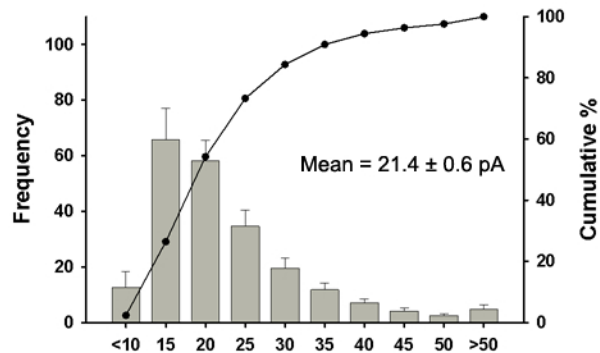

### Male Cocaine

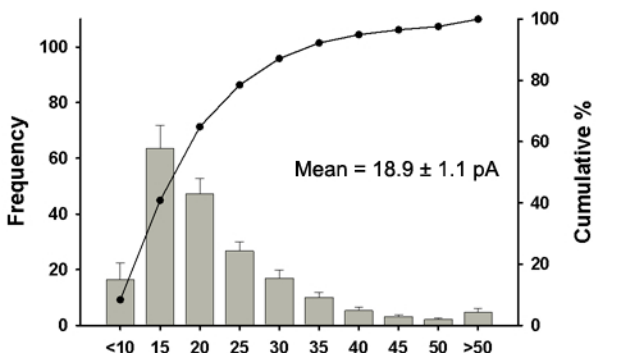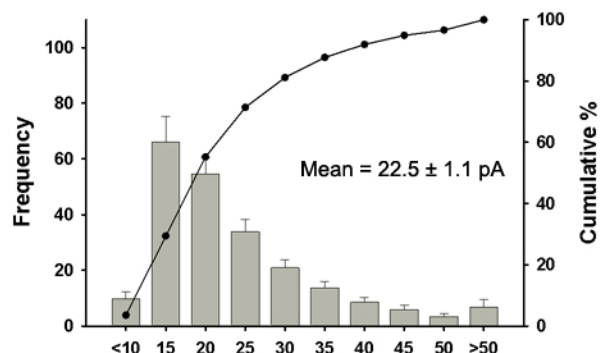

### Female Saline

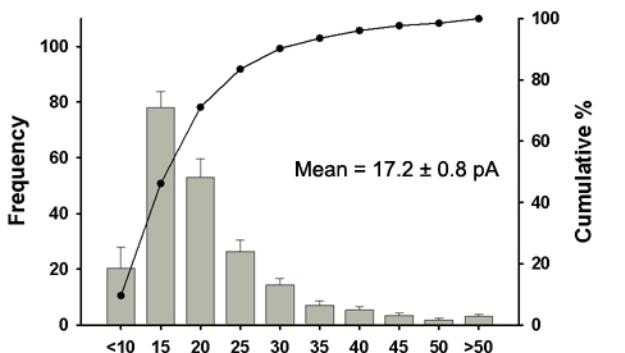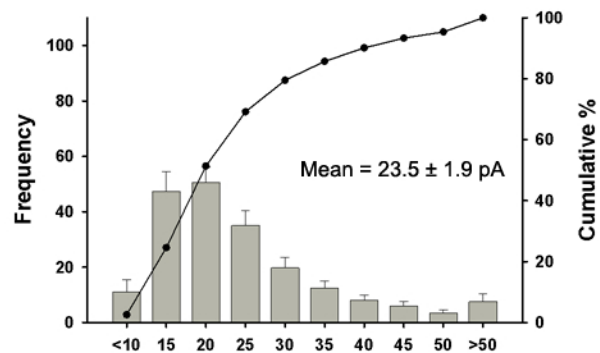

### Female Cocaine

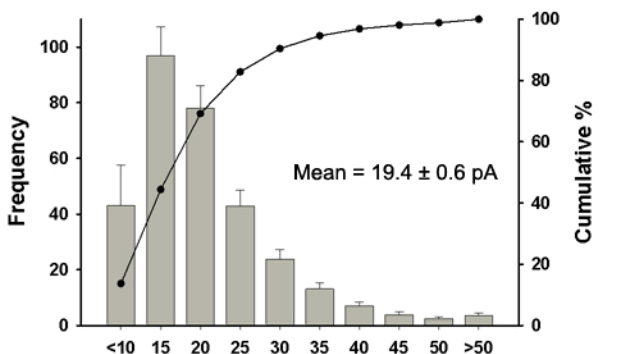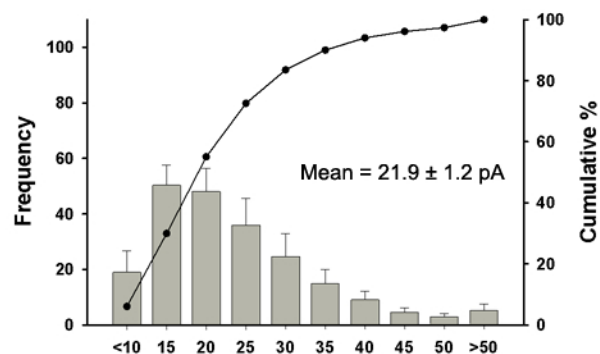

mEPSC amplitude (pA)

mEPSC amplitude (pA)
