# Supplementary material
Source: PubMed Central journal article supplement (PMC3105198)
Supplement: NIHMS289458-supplement-04.pdf [file NIHMS289458-supplement-04.pdf]

## Core

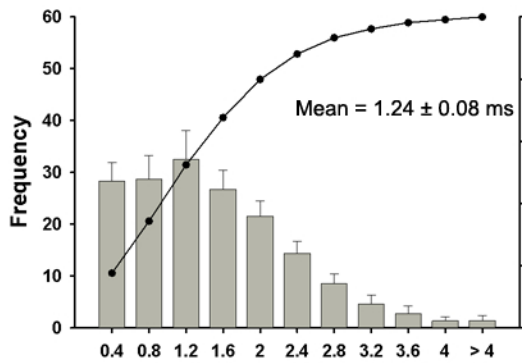

## Male Saline

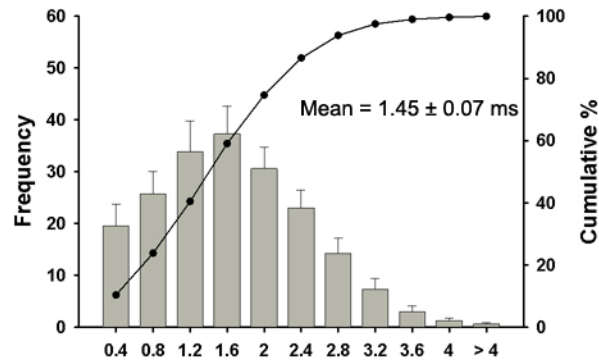

## Male Cocaine

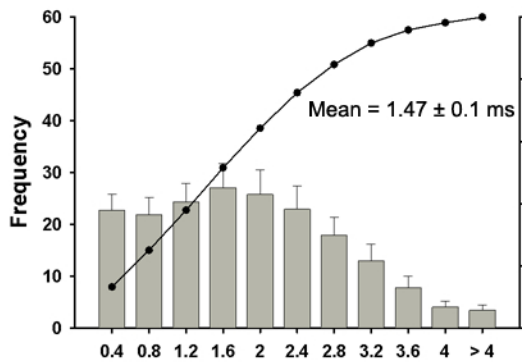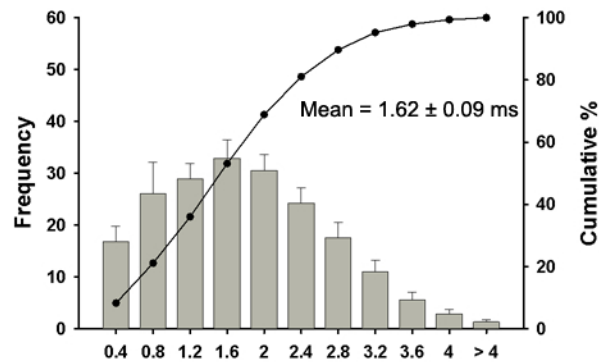

## Female Saline

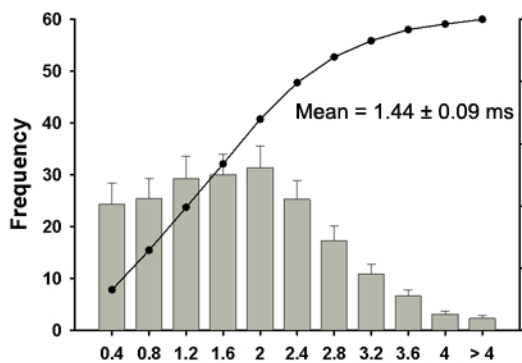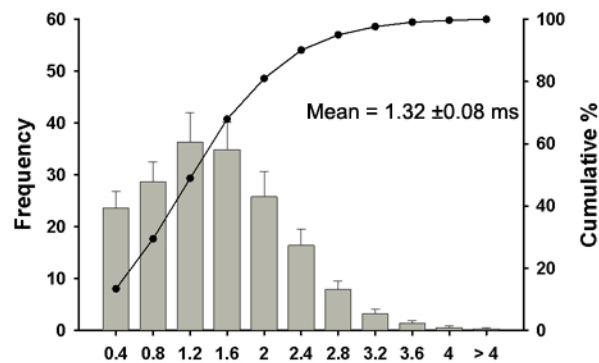

## Female Cocaine

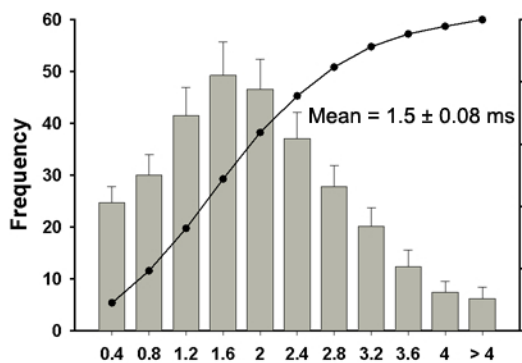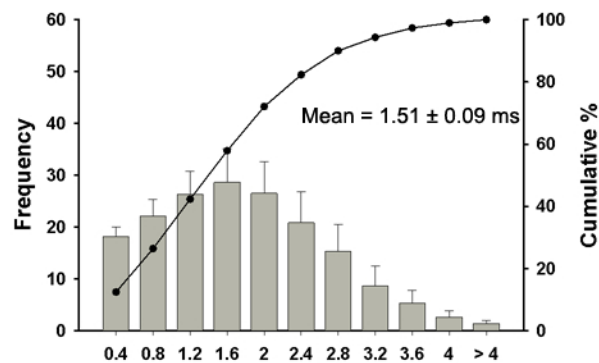

mEPSC decay time (ms)

mEPSC decay time (ms)
