# Supplementary material
Source: PubMed Central journal article supplement (PMC3105198)

# Core

# Shell

Lateral 1.4

Bregma 1.7

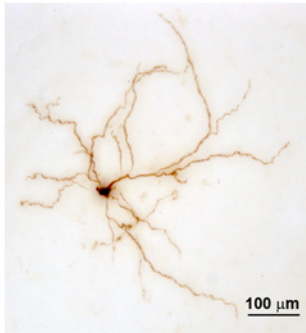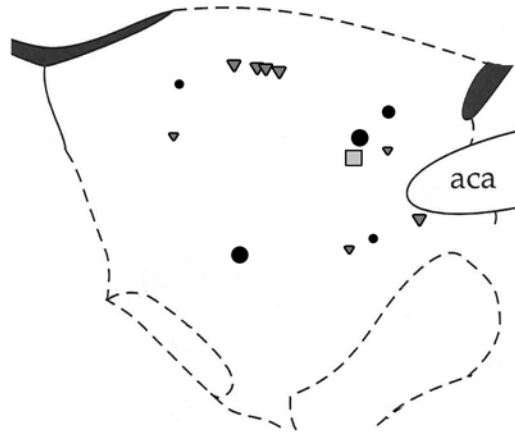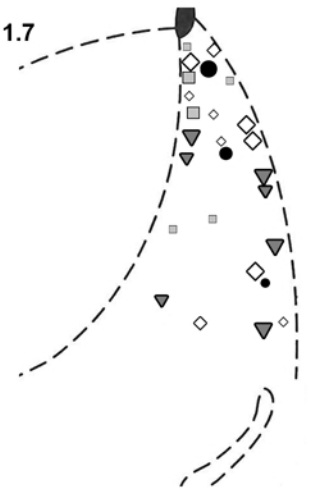

- ◇ M Sal
- ▽ M Coc
- ◻ F Sal
- F Coc
  
- ◻ ▽ ◊ < 3 Hz
- ◻ ▽ ◊ 3-5 Hz
- ◻ ▽ ◊ > 5 Hz

Lateral 1.9

Bregma 1.2

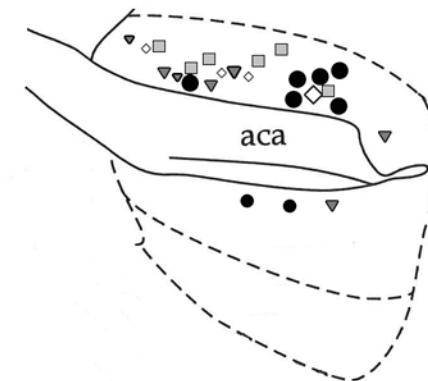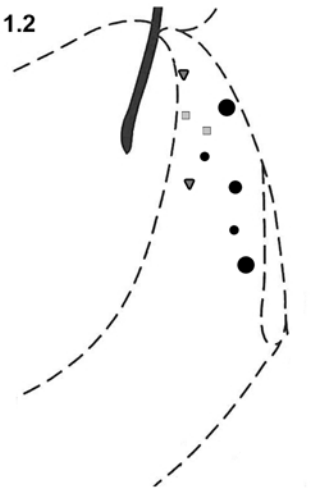

Lateral 2.4

Bregma 1.0

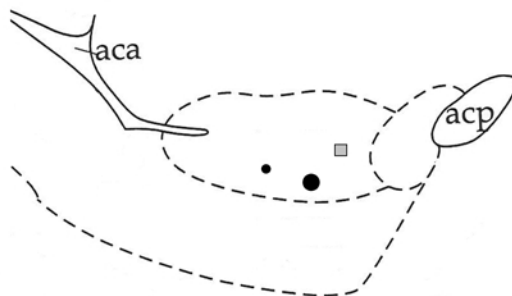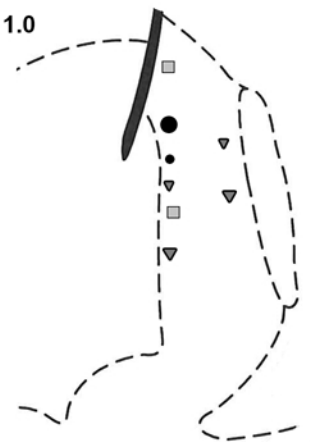

Supplement: NIHMS289458-supplement-02.pdf [file NIHMS289458-supplement-02.pdf]
